# Supplementary material
Source: publisher site journal article supplement (https://www.dovepress.com/article/370126)
Supplement: Supplementary file 1 [file get_supplementary_file.php]

**Table 1S** Summary of minimum inhibitory concentrations of nine antimicrobials against 67 *M. pneumoniae* isolates collected in 2019

| Antimicrobial agents | MIC (mg/L) |                   |                   |      | Interpretive criteria* |       |    |
|----------------------|------------|-------------------|-------------------|------|------------------------|-------|----|
|                      | MIC Range  | MIC <sub>50</sub> | MIC <sub>90</sub> | S, % | R, %                   | S     | R  |
| Moxifloxacin         | 0.06- 0.25 | 0.125             | 0.125             | 100  | 0                      | ≤0.25 | -  |
| Levofloxacin         | 0.5- 1     | 1                 | 1                 | 100  | 0                      | ≤1    | -  |
| Tetracycline         | 0.125- 1   | 0.5               | 1                 | 100  | 0                      | ≤2    | -  |
| Minocycline          | 0.125- 2   | 0.5               | 2                 | -    | -                      | -     | -  |
| Doxycycline          | 0.125- 1   | 0.5               | 0.5               | 100  | 0                      | ≤2    | -  |
| Erythromycin         | 128- >128  | >128              | >128              | 0    | 100                    | ≤0.5  | ≥1 |
| Roxithromycin        | 64- >128   | 128               | >128              | -    | -                      | -     | -  |
| Azithromycin         | 8- 64      | 16                | 32                | 0    | 100                    | ≤0.5  | ≥1 |
| Josamycin            | 2- 4       | 4                 | 4                 | -    | -                      | -     | -  |

**Note:** \*Interpretive criteria from CLSI M43-A.

**Abbreviations:** S, susceptible; R, resistant.

**Table 2S** Cumulative bacteriostatic rates (%) of nine antimicrobials against *M. pneumoniae* isolates of 2019

| Antimicrobials | MIC value (mg/L) |       |       |      |       |      |       |      |      |      |       |      |       |
|----------------|------------------|-------|-------|------|-------|------|-------|------|------|------|-------|------|-------|
|                | ≤0.06            | 0.125 | 0.25  | 0.5  | 1     | 2    | 4     | 8    | 16   | 32   | 64    | 128  | > 128 |
| Moxifloxacin   | 1.5              | 97.0  | 100.0 | -    | -     | -    | -     | -    | -    | -    | -     | -    | -     |
| Levofloxacin   | -                | -     | -     | 32.9 | 100.0 | -    | -     | -    | -    | -    | -     | -    | -     |
| Tetracycline   | -                | 1.5   | 11.9  | 91.0 | 100.0 | -    | -     | -    | -    | -    | -     | -    | -     |
| Minocycline    | -                | 1.5   | 6.0   | 59.7 | 76.1  | 92.5 | 100.0 | -    | -    | -    | -     | -    | -     |
| Doxycycline    | -                | 1.5   | 46.3  | 95.5 | 100.0 | -    | -     | -    | -    | -    | -     | -    | -     |
| Erythromycin   | -                | -     | -     | -    | -     | -    | -     | -    | -    | -    | -     | 19.4 | 100.0 |
| Roxithromycin  | -                | -     | -     | -    | -     | -    | -     | -    | -    | -    | 10.4  | 83.6 | 100.0 |
| Azithromycin   | -                | -     | -     | -    | -     | -    | -     | 16.4 | 82.1 | 98.5 | 100.0 | -    | -     |
| Josamycin      | -                | -     | -     | -    | -     | 25.4 | 100.0 | -    | -    | -    | -     | -    | -     |

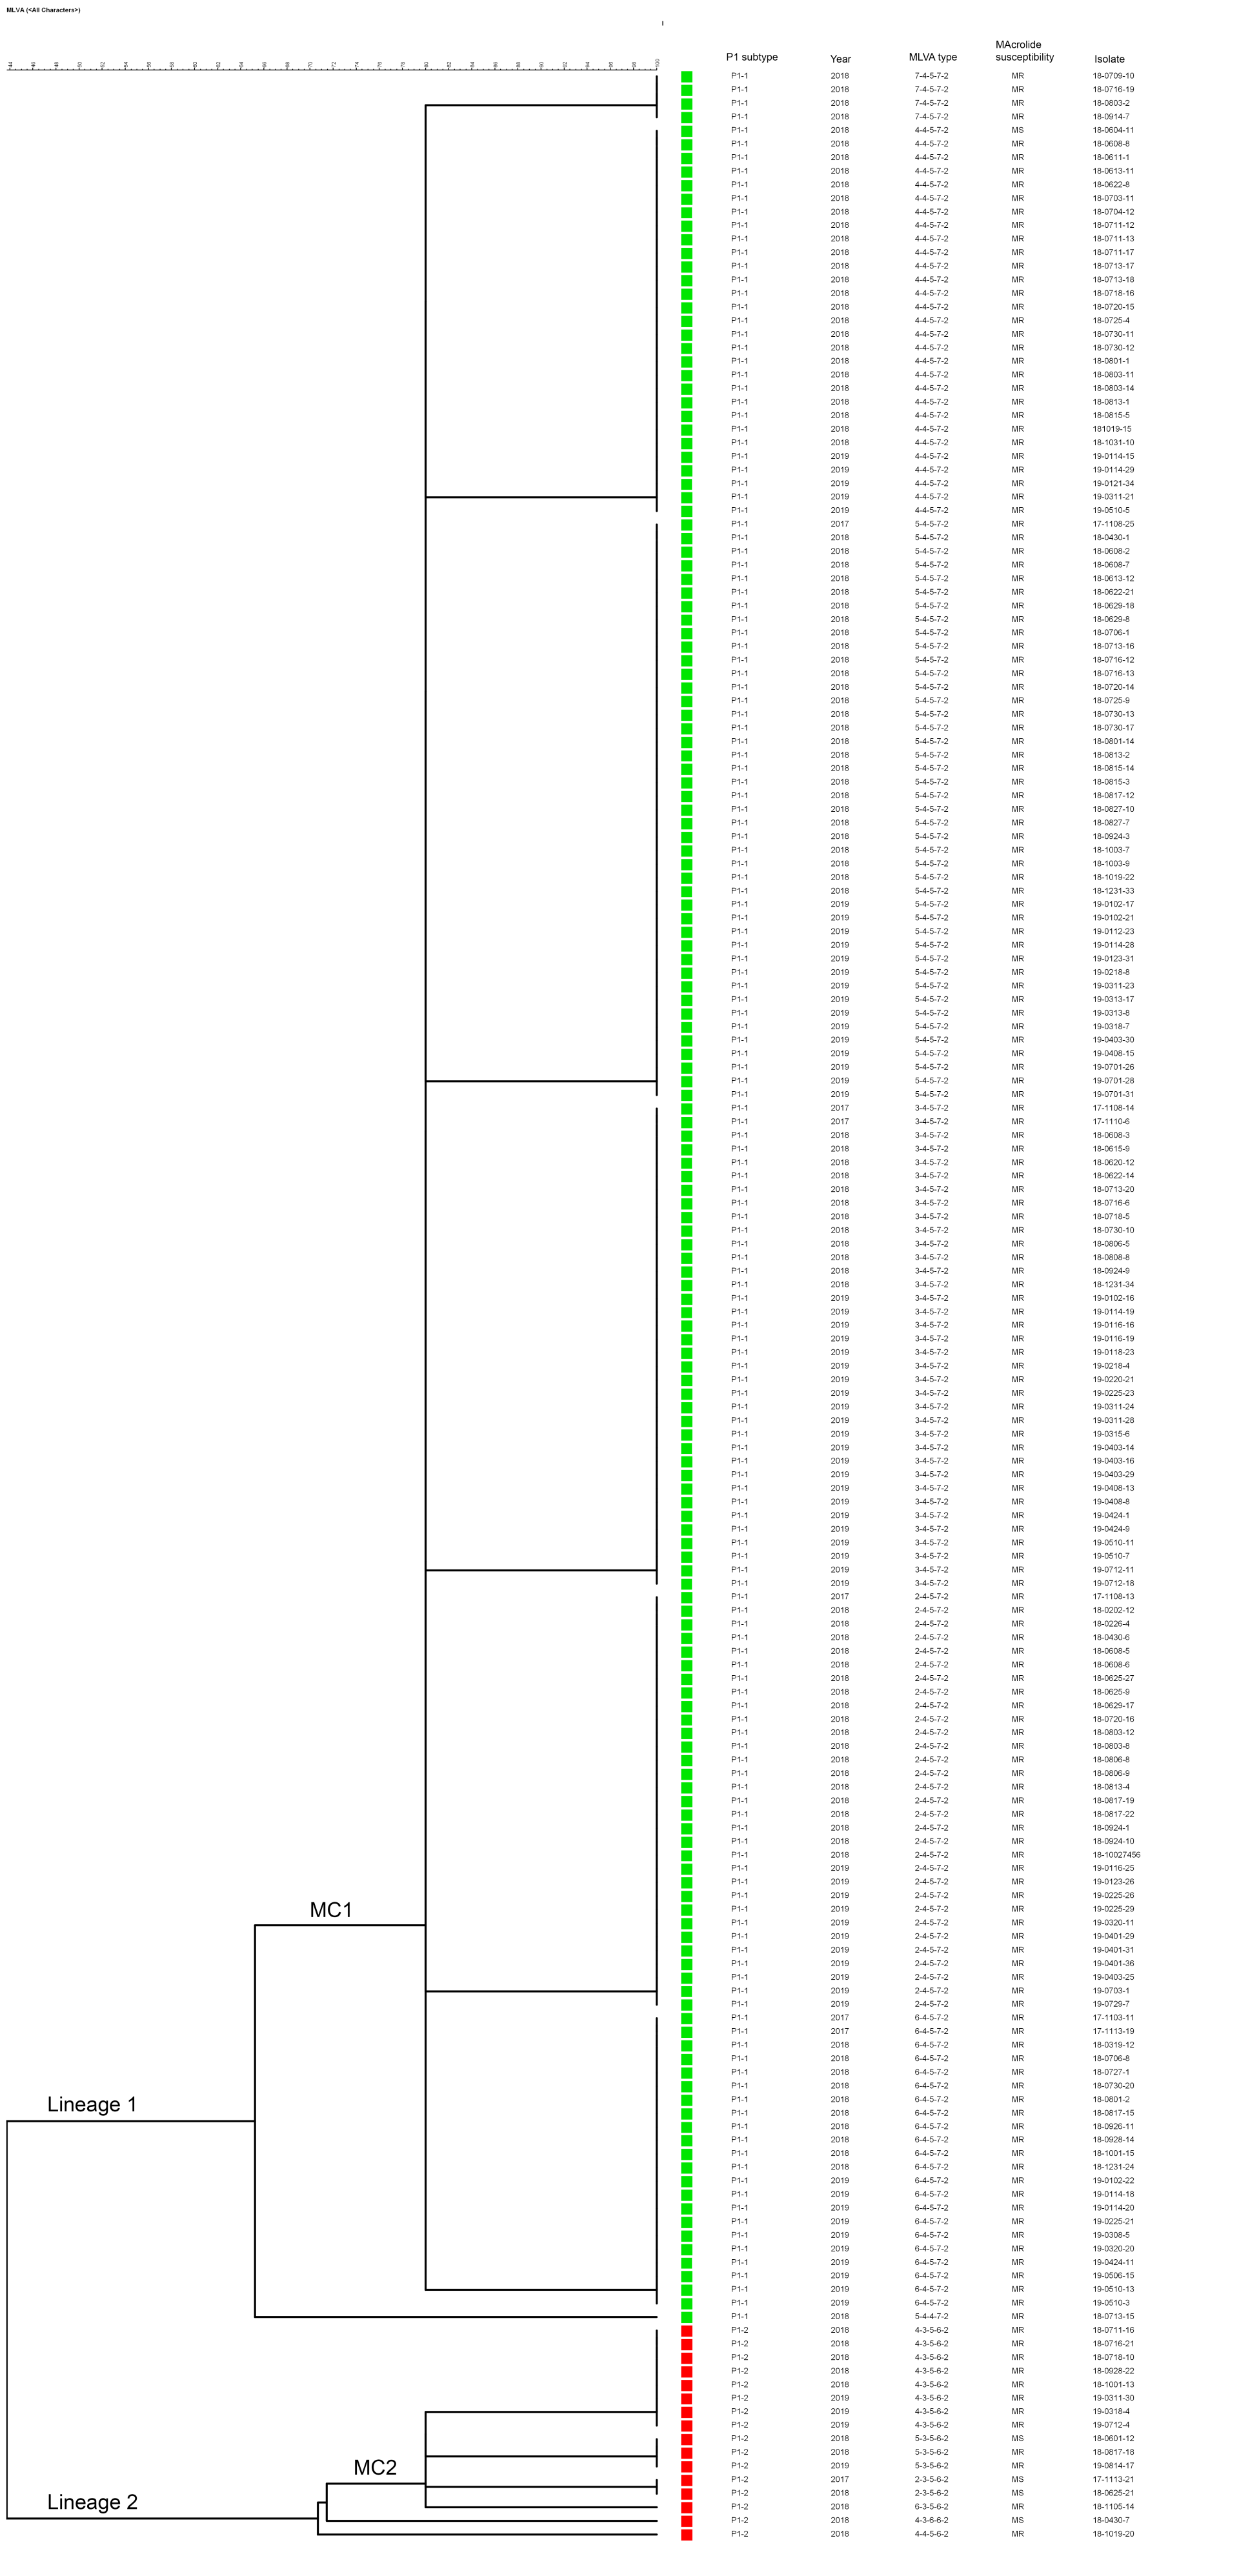

Supplementary Figure S1. Clustering of the 182 *M. pneumoniae* strains based on the 5-loci scheme by the unweighted pair group method with arithmetic mean (UPGMA) method. A cutoff value of 80% similarity was used to define the MLVA clusters (MC1 and MC2). The colors used are based on P1 subtypes.
